# Supplementary material for: Three-dimensional cardiac microtissues composed of cardiomyocytes and endothelial cells co-differentiated from human pluripotent stem cells
Source: Oxford University Press journal article supplement (doi:10.1242/dev.143438), 2017-01-01
Supplement: dev143438supp.pdf [file dev143438supp.pdf]

## SUPPLEMENTARY MATERIALS AND METHODS

### hPSC lines culture

Previously described NKX2-5<sup>eGFP/w</sup> hESCs and wild-type hiPSCs (Elliott et al., 2011; Zhang et al., 2014) were seeded on Vitronectin Recombinant Human Protein (Life technologies) and cultured in E8 medium (Life Technologies). Cells were passaged twice a week using PBS (Life Technologies) containing EDTA 0.5mM (Life Technologies). RevitaCell Supplement (Life Technologies; 1:200) was added during hiPSC passaging.

### Differentiation into endothelial cells and cardiomyocytes

Cardiac differentiation was induced in a monolayer as described previously (Elliott et al., 2011; van den Berg et al., 2015). Briefly, for CM condition,  $25 \times 10^3/\text{cm}^2$  were seeded on plates coated with 75  $\mu\text{g}/\text{mL}$  (growth factor reduced) Matrigel (Corning) the day before differentiation (day -1). At day 0, cardiac mesoderm was induced by changing E8 to BPEL medium (Bovine Serum Albumin [BSA] Polyvinyl alcohol Essential Lipids; (Ng et al., 2008)), supplemented with a mixture of cytokines (20 ng/mL BMP4, R&D Systems; 20 ng/mL ACTIVIN A, Miltenyi Biotec; 1.5  $\mu\text{M}$  GSK3 inhibitor CHIR99021, Axon Medchem). After 3 days, cytokines were removed and a Wnt inhibitor (5  $\mu\text{M}$ , XAV939, Tocris Bioscience) was added for 3 days. BPEL medium was refreshed every 3–4 days. Alternatively, for EC and CMEC conditions,  $12.5 \times 10^3$  cells/ $\text{cm}^2$  were seeded on matrigel at day -1. At day 0, cardiac mesoderm was induced as described above. At day 3, cytokines were removed and VEGF (50 ng/ml, R&D Systems) alone (EC condition) or in combination with XAV939 (5  $\mu\text{M}$ ) (CMEC condition) was added. BPEL medium supplemented with VEGF was refreshed every 3–4 days.

### FACS analysis

Staining was done in PBS containing 0.5% BSA (Sigma Aldrich) and 2 mM EDTA. Antibodies were used as follows: anti-VCAM1-PE (R&D); anti-CD34-APC (Miltenyi Biotec), anti-KDR-PE (R&D), anti-VEC-PECY7 (eBioscience), anti-CD31-APC (eBioscience), anti-CXCR4-PE (BD Biosciences); MACS Comp Bead kit antimouse IgK (Miltenyi Biotec). Samples were measured with a MACSQuant VYB (Miltenyi Biotec) equipped with a violet (405 nm), blue (488 nm) and yellow (561 nm) laser. In order to allow direct comparisons between different experimental groups, equal population gates were applied. Details of antibodies used are provided in Supplementary Table S2.

### Isolation of CD34<sup>+</sup> endothelial cells

CMEC population was detached on day 6 using TrypLE 1X for 5 min at 37°C, 5% CO<sub>2</sub>, centrifuged for 3 min at 1100 rpm, washed and re-suspended in 1 ml of EasySep buffer (PBS containing 2% FCS [Life Technologies] and 1mM EDTA) into a 5mL round-bottomed tube. Before isolation, a small aliquot was taken for anti-CD34-APC antibody staining and FACS

analysis (pre-isolation fraction). CD34<sup>+</sup> cells were isolated using a Human cord blood CD34 Positive selection kit II (Stem Cell Technologies) following the manufacturer's instructions. After isolation, an aliquot of post-isolation fraction was taken for anti-CD34-APC antibody staining and FACS analysis. CD34<sup>+</sup> cells were resuspended in BPEL medium and counted. For CD34<sup>+</sup> culture,  $10 \times 10^3/\text{cm}^2$  cells were seeded on Fibronectin (Fibronectin from bovine plasma 2-5 $\mu\text{g}/\text{ml}$ ; Sigma Aldrich) and cultured in BPEL medium supplemented with VEGF (50ng/ml). After 3-4 days, cells were confluent and cryopreserved (30cm<sup>2</sup>/vial) in CryoStor<sup>®</sup> CS10 medium (0.5ml/vial; Stem Cell Technologies) or dissociated for MT formation.

#### **Isolation of VCAM1<sup>+</sup> cardiomyocytes**

CM population was detached on day 14-17 using TrypLE 2X for 5 min at 37°C, 5% CO<sub>2</sub>, centrifuged for 3 min at 1100 rpm, washed and re-suspended in 1 ml of EasySep buffer into a 5mL round-bottom tube. Cell suspension was stained for 30 min at 4C with an anti-VCAM1-PE antibody described previously. After 30 min, a small aliquot was taken for FACS analysis (pre-isolation fraction). VCAM1<sup>+</sup> cells were isolated by using a Human PE Selection kit (Stem Cell Technologies) following the manufacturer instructions. After isolation, a small aliquot of post-isolation fraction was taken for FACS analysis. VCAM1<sup>+</sup> cells were resuspended in BPEL medium, counted and used for electrophysiology, immunofluorescence or MT formation.

#### **Generation and cultivation of cardiac microtissues**

To generate MTs from isolated VCAM1<sup>+</sup> cardiomyocytes, CM population was stained with anti-VCAM1-PE antibody and isolated as described above. Alternatively, CM population was dissociated using TrypLE 2X for 5 min at 37°C, 5% CO<sub>2</sub> (non-enriched VCAM1<sup>+</sup> cardiomyocytes). Endothelial cells were prepared as follow: briefly, 1 to 3 days before MT formation, a vial of cryopreserved endothelial cells was thawed and cultured in BPEL medium supplemented with VEGF (50 ng/ml) on Fibronectin-coated plates (Fibronectin from bovine plasma 2-5 $\mu\text{g}/\text{ml}$ ; Sigma Aldrich). The day of MT formation (day 0), endothelial cells were detached using TrypLE 1X for 5 min at 37 °C, 5% CO<sub>2</sub>, centrifuged for 3 min at 1100 rpm and resuspended in BPEL medium. For MT-CM: cardiomyocytes were diluted to 5000 cells per 50  $\mu\text{l}$  BPEL medium. For MT-CMEC: cell suspensions were combined together to 5000 cells per 50  $\mu\text{l}$  BPEL medium supplemented with 50 ng/ml VEGF. For both MT-CM and MT-CMEC, cell suspensions were seeded on V-bottom 96 well microplates (Greiner bio-one) and centrifuged for 10 min at 1100 rpm. MTs were incubated at 37°C, 5% CO<sub>2</sub> for 7-20 days with media refreshed every 3 days. Analysis of MTs was performed after 7-20 days in culture.

#### **Immunofluorescence analysis**

For immunostaining of VCAM1<sup>+</sup> cardiomyocytes, approximately  $200 \times 10^3/\text{cm}^2$  cells were seeded on 75  $\mu\text{g}/\text{mL}$  Matrigel-coated 13 mm plastic coverslips (Sarstedt) and fixed for 20 min in 4% paraformaldehyde, permeabilized for 10 min with PBS containing 0.1% Triton-X 100 (Sigma-Aldrich) and blocked for 1h with PBS containing 5% (vol/vol) FCS and 5% goat serum

(Vector Laboratories). Samples were incubated overnight at 4°C with TNNI (Santa Cruz) and  $\alpha$ -ACTININ (Sigma–Aldrich) antibodies. Primary antibodies were detected with Cy3- (Dianova) and Alexa Fluor 488- (Invitrogen) conjugated donkey secondary antibodies, for 1h at room temperature. Cells were washed three times with PBS, each time incubated for 20 min and stained with DAPI (Life Technologies) for 30 min at room temperature. Stained cells were mounted onto microscope slides with ProLong Gold antifade Mountant with DAPI (Life Technologies). Images were captured using Leica Microsystems LAS AF6000. Details of antibodies used are provided in Supplementary Table S2.

For whole mount microtissue immunofluorescence staining, MTs were washed in PBS on day 7 and fixed for 30 min with 4% paraformaldehyde, washed 3 times in PBS and stored at 4 °C until processing. MTs were permeabilized for 20 min with PBS containing 0.2% Triton X-100 and blocked for 2 h in PBS containing 5% FCS and 5% goat serum. All incubations were done at room temperature. Samples were then incubated overnight at 4°C with CD31 (Dako) and TNNI primary antibodies. MTs were washed 3 times with PBS at room temperature, each time incubated for 10 min. Secondary antibodies (Cy3 and Alexa Fluor 488) were added overnight at 4°C. The following day, MTs were washed 3 times with PBS at room temperature, each time incubated for 20 min and then stained with DAPI for 30 min at room temperature. MTs were mounted onto microscope slides with ProLong Gold antifade Mountant with DAPI. Images were captured using a Leica SP8WLL confocal laser-scanning microscope. Details of antibodies used are provided in Supplementary Table S2.

### **Patch Clamp**

Electrical signals were recorded with an Axopatch 200B Amplifier (Molecular Devices) and digitized with a Digidata 1440A (Molecular Devices) connected to an x86 Windows PC running pClamp 10.4. All measurements were performed at 37 °C. Data were analyzed with ClampFit 10.4 (Molecular Devices) and Prism 7.0a (Graphpad Software) for Mac. Current-clamp experiments were performed in the perforated patch configuration. Cells were perfused with Tyrode's solution containing (mM): 154 NaCl, 5.4 KCl, 1.8 CaCl<sub>2</sub>, 1 MgCl<sub>2</sub>, 5 HEPES-NaOH, 5.5 D-Glucose; pH was adjusted to 7.35 with NaOH. Glass capillaries (2-3.5 M $\Omega$ ) were filled with an intracellular solution containing (mM): 125 K-Gluconate, 20 KCl, 10 NaCl, 10 HEPES; pH was adjusted to 7.2 with KOH. Amphotericin B (Sigma Aldrich) was dissolved in DMSO just before the experiments and added to the intracellular solution to reach a final concentration of 0.22 mM.

### **Multielectrode array (MEA)**

MEA experiments were performed using a 64 electrodes USB-MEA system (Multichannel Systems). All the experiments were performed at 37 °C in BPEL medium. MEA chambers were coated with human Fibronectin (40  $\mu$ g/ml, Alfa Aesar) before MT seeding. Acute dose–response curves were generated by adding aliquots at fixed 1:100 dilutions every 10 min

(Navarrete et al., 2013). Traces were analyzed with a custom-made protocol to quantify both QT and RR intervals.

### **Contraction analysis**

Movies of paced MTs were acquired with a ThorLabs DCC3240M camera at 100 frames per second with the ThorLabs uc480 software (v 4.20). Contraction and contraction velocity profiles were obtained by analysing movies with a custom-made ImageJ macro (ImageJ v. 2.0.0-rc-49).

### **Gene expression analysis**

For RT-qPCR, total RNA was purified using the RNeasy Mini Kit (Qiagen) according to the manufacturer's protocol. 1 µg of RNA was reverse transcribed by using the iScript-cDNA Synthesis kit (Bio-Rad). Expression profiles of genes of interest were determined by qPCR using 6ng/µl of cDNA and the iTaq Universal SYBR Green Supermixes (Bio-Rad). Gene expression was assessed by a Bio-Rad CFX384 real time system. The expression of two reference genes (*RPL37A* and *HARP*) was stable in our samples and not affected by experimental conditions, therefore only *RPL37A* was used for normalization. Data were analyzed by using the  $\Delta\Delta C_t$  method (Livak and Schmittgen, 2001; Pfaffl, 2001). Further normalization to *TNNT2* or *VEC* is specified in figure legends. Primer sequences are provided in Supplementary Table S1.

Cell pellets of primary Human Umbilical Artery Endothelial Cell (HUAEC), Human Umbilical Vein Endothelial Cell (HUVEC), Human Dermal Blood Endothelial Cell (HDBEC) and Human Cardiac Microvascular Endothelial Cell (HCMEC) from PromoCell were used to extract RNA as described above.

### **Statistics**

Ordinary one-way, two-way ANOVA or Mann-Whitney test for paired or unpaired measurements were applied as appropriate to test for differences in means between groups/conditions. Post hoc comparison between individual means or medians was performed by Tukey's method, and P-values have been corrected for multiple testing using the Holm-Sidak or Dunn's method. Detailed statistics are indicated in each figure legend. Data are expressed and plotted as the Mean  $\pm$  SEM. Statistical significance was defined as  $P < 0.05$ . Statistical analysis was performed with GraphPad 7.0b for Mac.

## REFERENCES

- Elliott, D. A., Braam, S. R., Koutsis, K., Ng, E. S., Jenny, R., Lagerqvist, E. L., Biben, C., Hatzistavrou, T., Hirst, C. E., Yu, Q. C., et al.** (2011). NKX2-5eGFP/w hESCs for isolation of human cardiac progenitors and cardiomyocytes. *Nat Meth* **8**, 1037–1040.
- Livak, K. J. and Schmittgen, T. D.** (2001). Analysis of relative gene expression data using real-time quantitative PCR and the  $2^{-\Delta\Delta C(T)}$  Method. *Methods* **25**, 402–408.
- Navarrete, E. G., Liang, P., Lan, F., Sanchez-Freire, V., Simmons, C., Gong, T., Sharma, A., Burridge, P. W., Patlolla, B., Lee, A. S., et al.** (2013). Screening Drug-Induced Arrhythmia Using Human Induced Pluripotent Stem Cell-Derived Cardiomyocytes and Low-Impedance Microelectrode Arrays. *Circulation* **128**, S3–S13.
- Ng, E. S., Davis, R., Stanley, E. G. and Elefanty, A. G.** (2008). A protocol describing the use of a recombinant protein-based, animal product-free medium (APEL) for human embryonic stem cell differentiation as spin embryoid bodies. *Nat Protoc* **3**, 768–776.
- Pfaffl, M. W.** (2001). A new mathematical model for relative quantification in real-time RT-PCR. *Nucleic Acids Research* **29**, 45e–45.
- van den Berg, C. W., Elliott, D. A., Braam, S. R., Mummery, C. L. and Davis, R. P.** (2015). Differentiation of Human Pluripotent Stem Cells to Cardiomyocytes Under Defined Conditions. In *Patient-Specific Induced Pluripotent Stem Cell Models*, pp. 163–180. New York, NY: Springer New York.
- Zhang, M., D’Aniello, C., Verkerk, A. O., Wrobel, E., Frank, S., Ward-van Oostwaard, D., Piccini, I., Freund, C., Rao, J., Seebohm, G., et al.** (2014). Recessive cardiac phenotypes in induced pluripotent stem cell models of Jervell and Lange-Nielsen syndrome: Disease mechanisms and pharmacological rescue. *Proc Natl Acad Sci USA* **111**, E5383–E5392.

**Table S1.** Primer sequences for qRT-PCR.

| <b>Primer</b>  | <b>Forward</b>           | <b>Reverse</b>           |
|----------------|--------------------------|--------------------------|
| <i>RPL37A</i>  | GTGGTTCCTGCATGAAGACAGTG  | TTCTGATGGCGGACTTTACCG    |
| <i>MESP1</i>   | GTGCTGGCTCTGTTGGAGA      | CAGAGACGGCGTCAGTTGT      |
| <i>TBX5</i>    | GGGCAGTGATGACATGGAG      | GCTGCTGAAAGGACTGTGGT     |
| <i>ISL1</i>    | AAAGTTACCAGCCACCTTGA     | ATTAGAGCCCGGTCCTCCTT     |
| <i>NKX2.5</i>  | CAAGTGTGCGTCTGCCTTT      | TTGTCCGCCTCTGTCTTCTC     |
| <i>TNNT2</i>   | AGCATCTATAACTTGGAGGCAGAG | TGGAGACTTTCTGGTTATCGTTG  |
| <i>ETV2</i>    | CAGCTCTCACCGTTTGCTC      | AGGAACTGCCACAGCTGAAT     |
| <i>KDR</i>     | CCATCTCAATGTGGTCAACCTTCT | TCCTCAGGTAAGTGGACAGGTTTC |
| <i>VEC</i>     | GGCATCATCAAGCCCATGAA     | TCATGTATCGGAGGTCGATGGT   |
| <i>CD31</i>    | GCATCGTGGTCAACATAACAGAA  | GATGGAGCAGGACAGGTTTCAG   |
| <i>MEOX2</i>   | CCAAGGATGCACAGTCTGG      | AGGAGGAAAACCTTCGTGCTG    |
| <i>GATA4</i>   | GACAATCTGGTTAGGGGAAGC    | GAGAGATGCAGTGTGCTCGT     |
| <i>GATA6</i>   | TCCAACTTCCACCTCTTCTAAC   | TCTCCCGCACCACTCATC       |
| <i>MYL2</i>    | TACGTTCCGGAAATGCTGAC     | TTCTCCGTGGGTGATGATG      |
| <i>MYL7</i>    | CCGTCTTCTCACGCTCTT       | TGAACTCATCCTTGTTCCACCAC  |
| <i>MYL4</i>    | AAGCCTTTGTCAAGCACATCA    | AGGACTCCATCTCAGCTCACC    |
| <i>MYL3</i>    | AAGGAGGTCGAGTTTGATGCT    | TCCTTGAACCTTCAATCTGCTC   |
| <i>MYH6</i>    | CCAGGTCAACAAGCTTCGAG     | TGCACTCCTCATCGTGCAT      |
| <i>MYH7</i>    | AGTCCCAGGTCAACAAGCTG     | GGGCTGAGCAGATCAAGATG     |
| <i>TNNI1</i>   | GTGGGTGACTGGAGGAAGAA     | GTGAGCTGGGTTGGAGAAGA     |
| <i>TNNI3</i>   | CACCTCAAGCAGGTGAAGAAG    | CAGGAAGGCTCAGCTCTCAA     |
| <i>ACTN2</i>   | GATGGAGCACATTCGTGTTG     | TGATCCATCAGGCCATTCTT     |
| <i>TCAP</i>    | GGCAGAATGGAAGGATCTGAC    | TGTCTCTGGGTGTCCTCCTC     |
| <i>SCN5A</i>   | GAGCTCTGTCACGATTTGAGG    | GAAGATGAGGCAGACGAGGA     |
| <i>CACNA1C</i> | CAATCTCCGAAGAGGGGTTT     | TCGCTTCCAGACATTCCAGGT    |
| <i>KCNQ1</i>   | TCCTGGTCTGCCTCATCTTC     | AAGAACACCACCAGCACGAT     |
| <i>KCNE1</i>   | TCTCTGGCCAGTTTCACACA     | CTCAAACCTTCCAGGCACAC     |
| <i>KCNJ12</i>  | TGGATCCTTTCCAGTTGGTG     | CGGCTCCTCTTGAGTTCTATCTT  |
| <i>KCNJ2</i>   | CGCTTTTACAAACCACTGGA     | TGGGAGCCTTGTGGTTCTAC     |
| <i>HCN4</i>    | CAATGAGGTGCTGGAGGAGT     | GGTCGTGCTGGACTTTGTG      |
| <i>NCX1</i>    | ACATCTGGAGCTCGAGGAAA     | CTGGAATTCGAGCTCTCCAC     |
| <i>SERCA2A</i> | ACAATGGCGCTCTCTGTTCT     | ATCCTCAGCAAGGACTGGTTT    |
| <i>PLN</i>     | TCCATAAACTGGGTGACAGA     | TGATACCAGCAGGACAGGAAG    |
| <i>RYR2</i>    | GCTATTCTGCACACGGTCATT    | ATTTCCGTGCCACTTCTTTT     |
| <i>CASQ2</i>   | CCGGGACAATACTGACAACC     | CTTCTCCCAGTAGGCAACGA     |
| <i>S100A1</i>  | CTGAGCAAGAAGGAGCTGAAAG   | ACCTTGTCCACAGCATCCAC     |

|                 |                       |                       |
|-----------------|-----------------------|-----------------------|
| <i>TRDN</i>     | GTGTCTCCCACAAAGCAGAAA | GGTCTGCAGGAGTGAAAGGA  |
| <i>NPPA</i>     | TGATCGATCTGCCCTCCTAA  | TCCTCCCTGGCTGTTATCTTC |
| <i>NPPB</i>     | GCTTTGGGAGGAAGATGGAC  | TGTGGAATCAGAAGCAGGTGT |
| <i>ACTA1</i>    | AAGAGCTACGAGCTGCCAGA  | ACAGGTCCTTCCTGATGTCCG |
| <i>CKMT2</i>    | CAAGGACCCACGCTTTTCTA  | TCCACCAGGTAATTGACTCCA |
| <i>ITGA7</i>    | CATCCTCCTGGCTGTAAGG   | GGAATCTTCACCGCATGGTA  |
| <i>COUPTFII</i> | GCTTTCCACATGGGCTACAT  | CAAGTGGAGAAGCTCAAGGC  |
| <i>FOXC2</i>    | GAGCCGTCTCGGAAGCAG    | CCGCAGCCCGGTAGTAATTC  |
| <i>NRP1</i>     | AACACCAACCCACAGATG    | AAGTTGCAGGCTTGATTCTG  |
| <i>NRP2</i>     | CTGGAAGCAGCATTGTGTG   | TAACTCGCTGATGGGGAGA   |
| <i>HEY2</i>     | TCATGAAGTCCATGGCAAGA  | TTGTGCCAACTGCTTTTAA   |
| <i>NFATC1</i>   | GCCCCTATTCTGTAACGGT   | ATGTGGCAACTAGGAGTGGG  |
| <i>CX40</i>     | AATCAGTGCCTGGAGAATGG  | CGAACCTGGATGAAACCTTC  |
| $\beta_1AR$     | AAGAGAAAGGATGGAGGCAAA | GCCCTACACAAGGAAAGCAA  |
| $\beta_2AR$     | TGGTGATCATGGTCTTCGTCT | TCCACCTGGCTAAGGTTCTG  |

**Table S2.** Antibodies used for FACS and immunofluorescence analyses.

|                           | <b>Antibody</b>   | <b>Company</b>  | <b>Catalogue number</b> | <b>Dilution</b> |
|---------------------------|-------------------|-----------------|-------------------------|-----------------|
| <b>FACS</b>               | Anti-VCAM1-PE     | R&D             | FAB5649P                | 1:20            |
|                           | Anti-CD34-APC     | Miltenyi Biotec | 130-090-954             | 1:20            |
|                           | Anti-KDR-PE       | R&D             | FAB357P                 | 1:20            |
|                           | Anti-VEC-PECY7    | eBioscience     | 25-1449-42              | 1:100           |
|                           | Anti-CXCR4-PE     | BD Pharmigen    | 555974                  | 1:20            |
|                           | Anti-CD31-APC     | eBioscience     | 17-0319-42              | 1:100           |
|                           | Mouse IgG2a-APC   | Miltenyi Biotec | 130-098-850             | 1:20            |
|                           | Mouse IgG2A PE    | R&D             | IC003P                  | 1:20            |
|                           | Mouse IgG1 PE     | R&D             | IC002P                  | 1:20            |
|                           | Mouse IgG1 K APC  | eBioscience     | 17-4714-41              | 1:100           |
| <b>Immunofluorescence</b> | TNNI              | Santa Cruz      | Sc-15368                | 1:500           |
|                           | $\alpha$ -ACTININ | Sigma-Aldrich   | A7811                   | 1:800           |
|                           | CD31              | Dako            | M0823                   | 1:200           |
|                           | Cy3               | Dianova         | 715-165-150             | 1:100           |
|                           | AF488             | Invitrogen      | A21206                  | 1:200           |

| Study                    | Cardiac tissue given name             | Number of cells per cardiac tissue                                                                         | CM source                         | EC source                                               | CM culture medium                                                 | EC culture medium                                                                                         | Cardiac tissue medium (in the presence of ECs)                     | Substrate/scaffold                                                                                         | Assays performed                                                                                                                | Purpose of the study |
|--------------------------|---------------------------------------|------------------------------------------------------------------------------------------------------------|-----------------------------------|---------------------------------------------------------|-------------------------------------------------------------------|-----------------------------------------------------------------------------------------------------------|--------------------------------------------------------------------|------------------------------------------------------------------------------------------------------------|---------------------------------------------------------------------------------------------------------------------------------|----------------------|
| Narmoneva et al., 2004   | Three-Dimensional culture             | $0.7 \times 10^6$ cells/cm <sup>2</sup> (CMs alone) or $1.4 \times 10^6$ cells/cm <sup>2</sup> (coculture) | Neonatal mouse CMs (1-2 days old) | Mouse ECs from heart and lungs (6-8 weeks old)          | DMEM + 7% fetal calf serum                                        | DMEM + 20% fetal calf serum + porcine heparin + endothelial cell growth stimulant                         | DMEM + 10% fetal calf serum                                        | 1% peptide hydrogel scaffolds                                                                              | Immunofluorescence; cell death assay; evaluation of contractile areas                                                           | Transplantation      |
| Caspi et al., 2007       | Engineered cardiac tissue             | $4 \times 10^5$ cells per tissue                                                                           | hESCs                             | hESCs or HUVEC                                          | Knockout DMEM + 20% fetal bovine serum                            | hESC-ECs: Endothelial cell growth medium<br>HUVEC: EGM-2 medium + 2% FBS                                  | 50% EGM-2 and 50% standard ES cell culture medium                  | Porous sponges composed of 50% poly-L-lactic acid (PLLA) and 50% polylactic-glycolic acid (PLGA); Matrigel | Immunofluorescence; cell viability assay; laser scanning confocal Ca <sup>2+</sup> imaging                                      | Transplantation      |
| Stevens et al., 2009     | Cardiac tissue patch                  | $3 \times 10^6$ cells per patch                                                                            | hESCs                             | hESCs or HUVEC                                          | RPMI + B27                                                        | hESC-ECs: huEB medium (80% KO-DMEM + 20% FBS) + VEGF g 50 ng/mL<br>HUVEC: EGM-2 medium                    | huEB medium or huEB medium + M199 medium or RPMI-B27 medium        | X                                                                                                          | Immunofluorescence; Passive mechanical measurements; <i>in vivo</i> transplantation into skeletal muscle; engraftment in heart  | Transplantation      |
| Tulloch et al., 2011     | Engineered Myocardium/ cardiac muscle | $2 \times 10^6$ CMs or $2 \times 10^6$ CMs + $1 \times 10^6$ HUVEC                                         | hESCs or hiPSCs                   | HUVEC                                                   | RPMI + B27 followed by 80% Knockout-DMEM + 20% fetal bovine serum | EBM2                                                                                                      | 80% Knockout-DMEM and 20% fetal bovine serum                       | Collagen type I, 11% mouse basement membrane extract                                                       | Immunofluorescence; transmission electron microscopy; gene expression profile; cardiac engraftment                              | Transplantation      |
| Ravenscroft et al., 2016 | Cardiac Microtissue                   | 500 cells per 100 $\mu$ l                                                                                  | hESCs or hiPSCs                   | Primary human coronary artery endothelial cells (HCAEC) | hESC-CM: RPMI + B27<br>hiPSC-CM: iCell CM maintenance media       | Endothelial basal medium MV2 + 5% FCS + supplements( EGF, bFGF, IGF, VEGF, Ascorbic Acid, Hydrocortisone) | 50% RPMI + B27 (or iCell CM medium) + 50% MV2 medium + supplements | X                                                                                                          | Immunofluorescence; gene expression profile; video-based edge detection of contraction; Ca <sup>2+</sup> transient measurements | Drug toxicity tests  |



|                        |                           |                                                                            |                 |               |                            |                  |                                                                                               |                                                                                             |                                                                                                |                                                                      |
|------------------------|---------------------------|----------------------------------------------------------------------------|-----------------|---------------|----------------------------|------------------|-----------------------------------------------------------------------------------------------|---------------------------------------------------------------------------------------------|------------------------------------------------------------------------------------------------|----------------------------------------------------------------------|
| Masumoto et al., 2016  | Engineered cardiac tissue | 3 x 10 <sup>6</sup> cells per tissue                                       | hiPSCs          | hiPSCs        | RPMI+ B27                  | RPMI+ B27 + VEGF | High glucose-modified Dulbecco's essential medium + 20% fetal bovine serum                    | Acid-soluble rat-tail collagen type I neutralized with alkali<br>Buffer;<br>Matrigel        | Contractile force measurements; implantation in rats; next-generation RNA sequencing           | Transplantation                                                      |
| Mannhardt et al., 2016 | Engineered heart tissue   | 1 x 10 <sup>6</sup> cells per tissue                                       | hiPSCs          | X             | DMEM/F-12 followed by RPMI | X                | DMEM + 10% horse serum + 10 µg/ml insulin + 33 µg/ml aprotinin<br><br>(No endothelial cells)  | Agarose and custom-made Teflon spacers casting molds with solid silicone racks;<br>Matrigel | Contraction analysis                                                                           | Transplantation                                                      |
| Huebsch et al., 2016   | Micro-Heart muscle        | 2 x 10 <sup>3</sup> cells per tissue (+ 2 x 10 <sup>3</sup> stromal cells) | hiPSCs          | X             | RPMI+ B27                  | X                | Knockout Dulbecco's Modified Eagle Medium + 20% fetal bovine serum following RPMI+ B27 medium | PDMS stencils                                                                               | Immunofluorescence; Scanning Electron Microscopy; Video Microscopy based drug response studies | Drug response analysis                                               |
| Present study          | Cardiac microtissue       | 5 x 10 <sup>3</sup> cells per tissue (5000 cells per 50 µl)                | hESCs or hiPSCs | hESC or hiPSC | BPEL                       | BPEL + VEGF      | BPEL + VEGF                                                                                   | X                                                                                           | Immunofluorescence; in depth gene expression profile; MEA analysis; contraction analysis       | Cardiac disease modeling<br><br>Drug screening<br><br>Drug discovery |

TABLE S3. Comparison between existing cardiac tissue models.

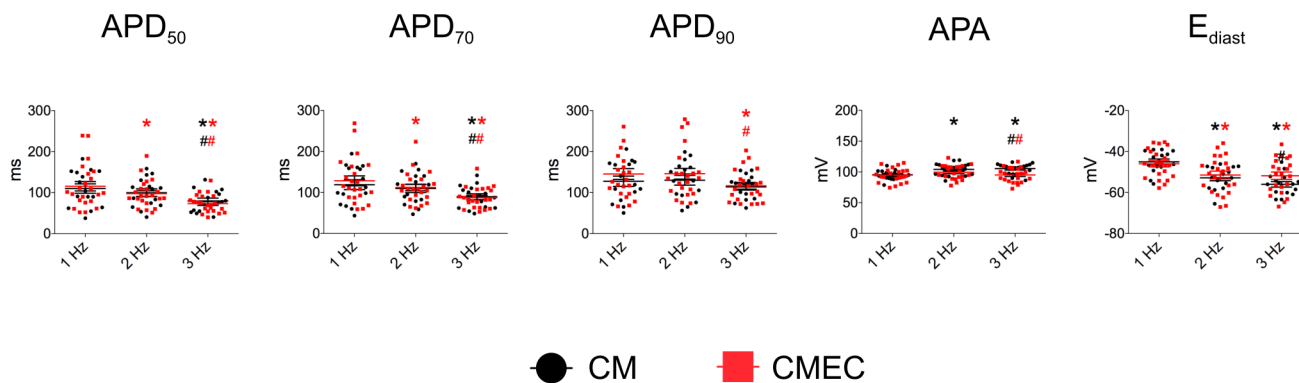

**FIGURE S1**

**Figure S1. Rate dependency of cardiomyocytes differentiated upon CM and CMEC condition.** Electrophysiological analysis of day 21 *NKX2-5<sup>eGFP/w</sup>* hESC cardiomyocytes differentiated under CM (black) and CMEC (red) conditions. \* =  $p < 0.05$  vs. 1 Hz. # =  $p < 0.05$  vs. 2 Hz. Data were analyzed with repeated measurement. Two-way ANOVA with Sidak's multiple comparisons test. N = 16-24 from three independent differentiation experiments.

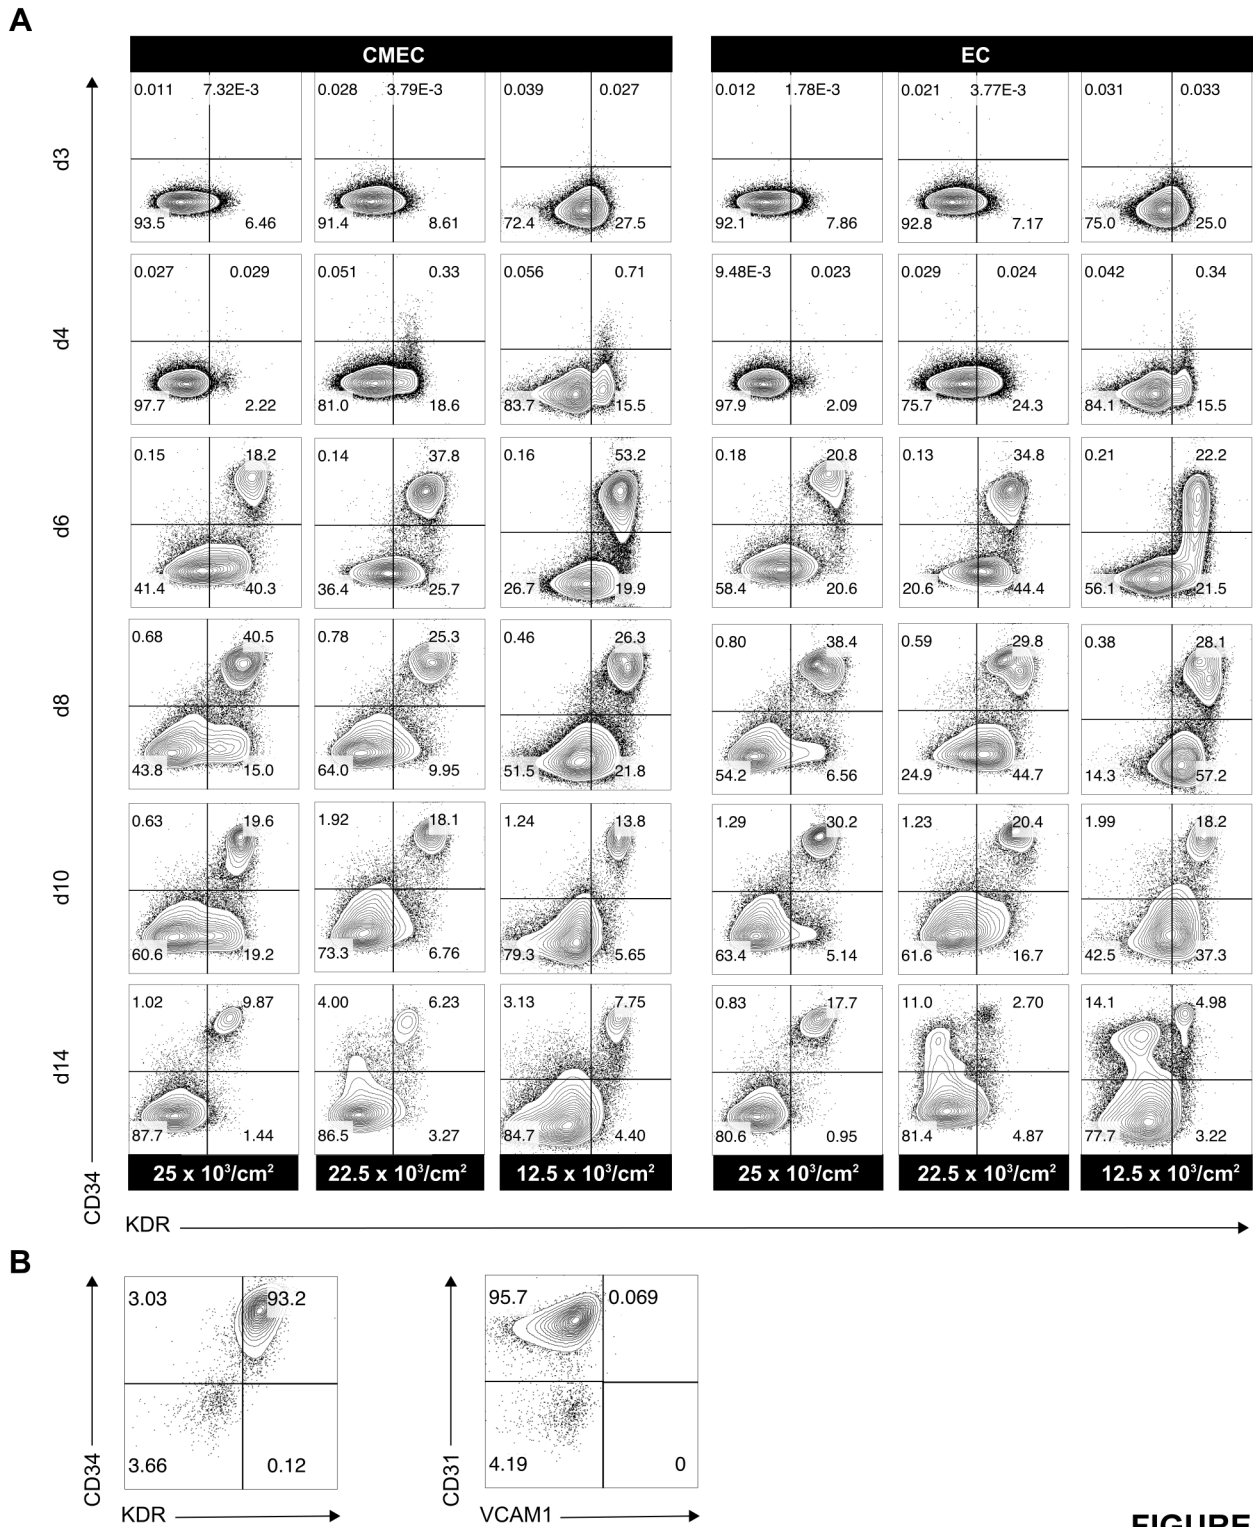

FIGURE S2

**Figure S2. Isolation of CD34<sup>+</sup> endothelial cells.** (A) FACS plots for CD34 together with KDR of CMEC and EC populations measured in the NKX2.5<sup>eGFP/w</sup> hESCs at the indicated time points (d=days) of differentiation at different cell-seeding densities. Numbers in the quadrants represent the respective percentage of cells. N = 1. (B) FACS plots for CD34 together with KDR (left panel) and for CD31 together with VCAM1 (right panel) of enriched CD34<sup>+</sup> endothelial cells measured in the NKX2.5<sup>eGFP/w</sup> hESCs after cryopreservation and replating. Numbers in the quadrants represent the respective percentage of cells. N = 1.

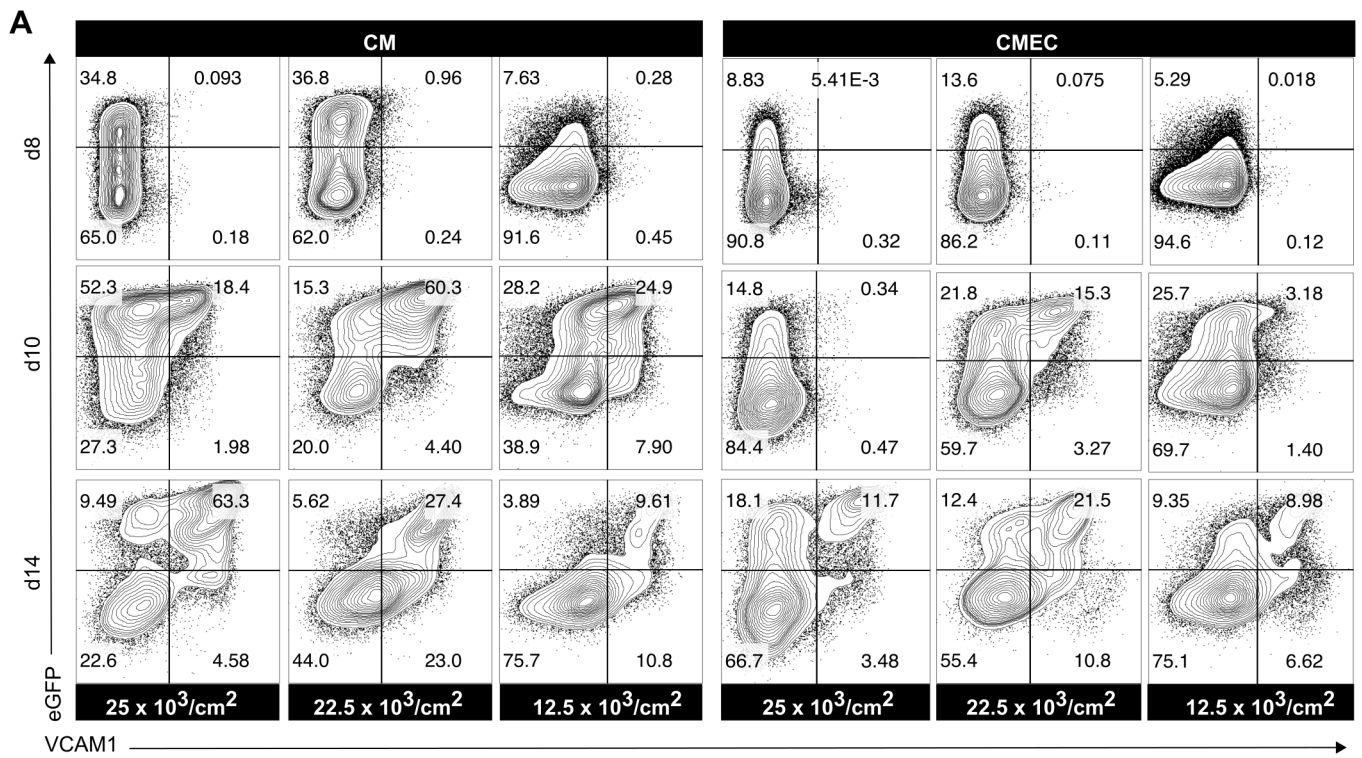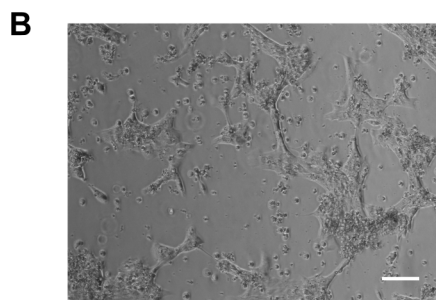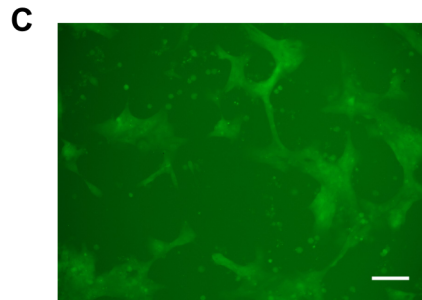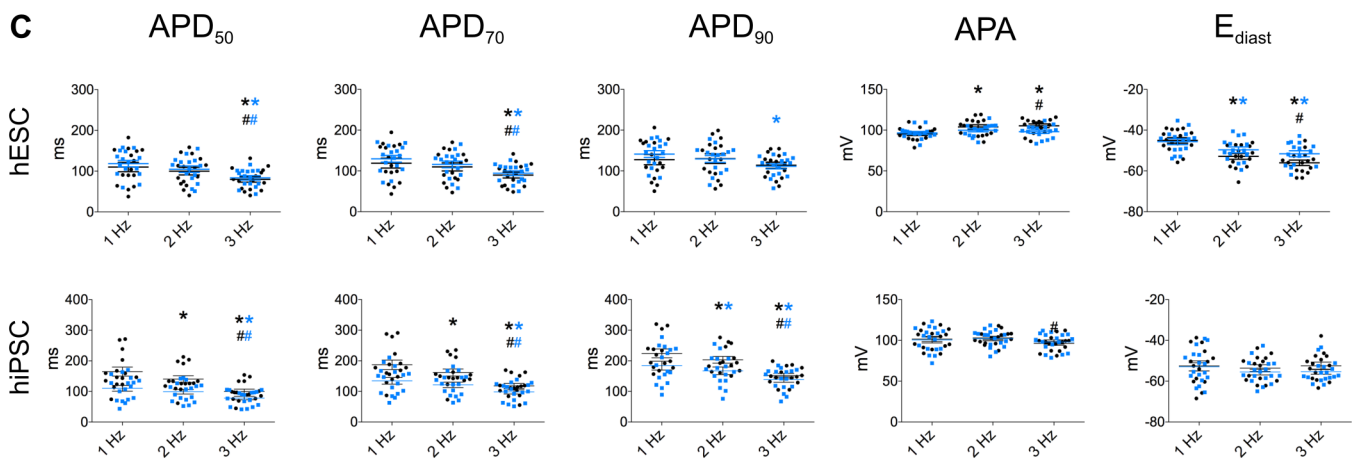

**FIGURE S3**

**Figure S3. Isolation of VCAM1<sup>+</sup> cardiomyocytes.** (A) FACS plots for VCAM1 together with eGFP of CM and CMEC populations measured in the NKX2.5<sup>eGFP/w</sup> hESCs at the indicated time points (d=days) of differentiation at different cell-seeding densities. Numbers in the quadrants represent the respective percentage of cells. N = 1. (B) Representative bright field and (C) GFP fluorescence images of the morphological appearance of CM-derived VCAM1<sup>+</sup> cardiomyocytes from NKX2.5<sup>eGFP/w</sup> hESCs after isolation and re-plating. Scale bar: 100  $\mu$ m. (D) Rate dependency of non-enriched (black) and enriched VCAM1<sup>+</sup> (blue) cardiomyocytes. Action potential parameters from cardiomyocytes differentiated from NKX2-5<sup>eGFP/w</sup> and hiPSCs. \* = p < 0.05 vs. 1 Hz. # = p < 0.05 vs. 2 Hz. Data were analyzed with repeated measurement Two-way ANOVA with Sidak's multiple comparisons test. N = 16-16 for hESCs and N=15-18 for hiPSCs, each from three independent differentiation experiments.

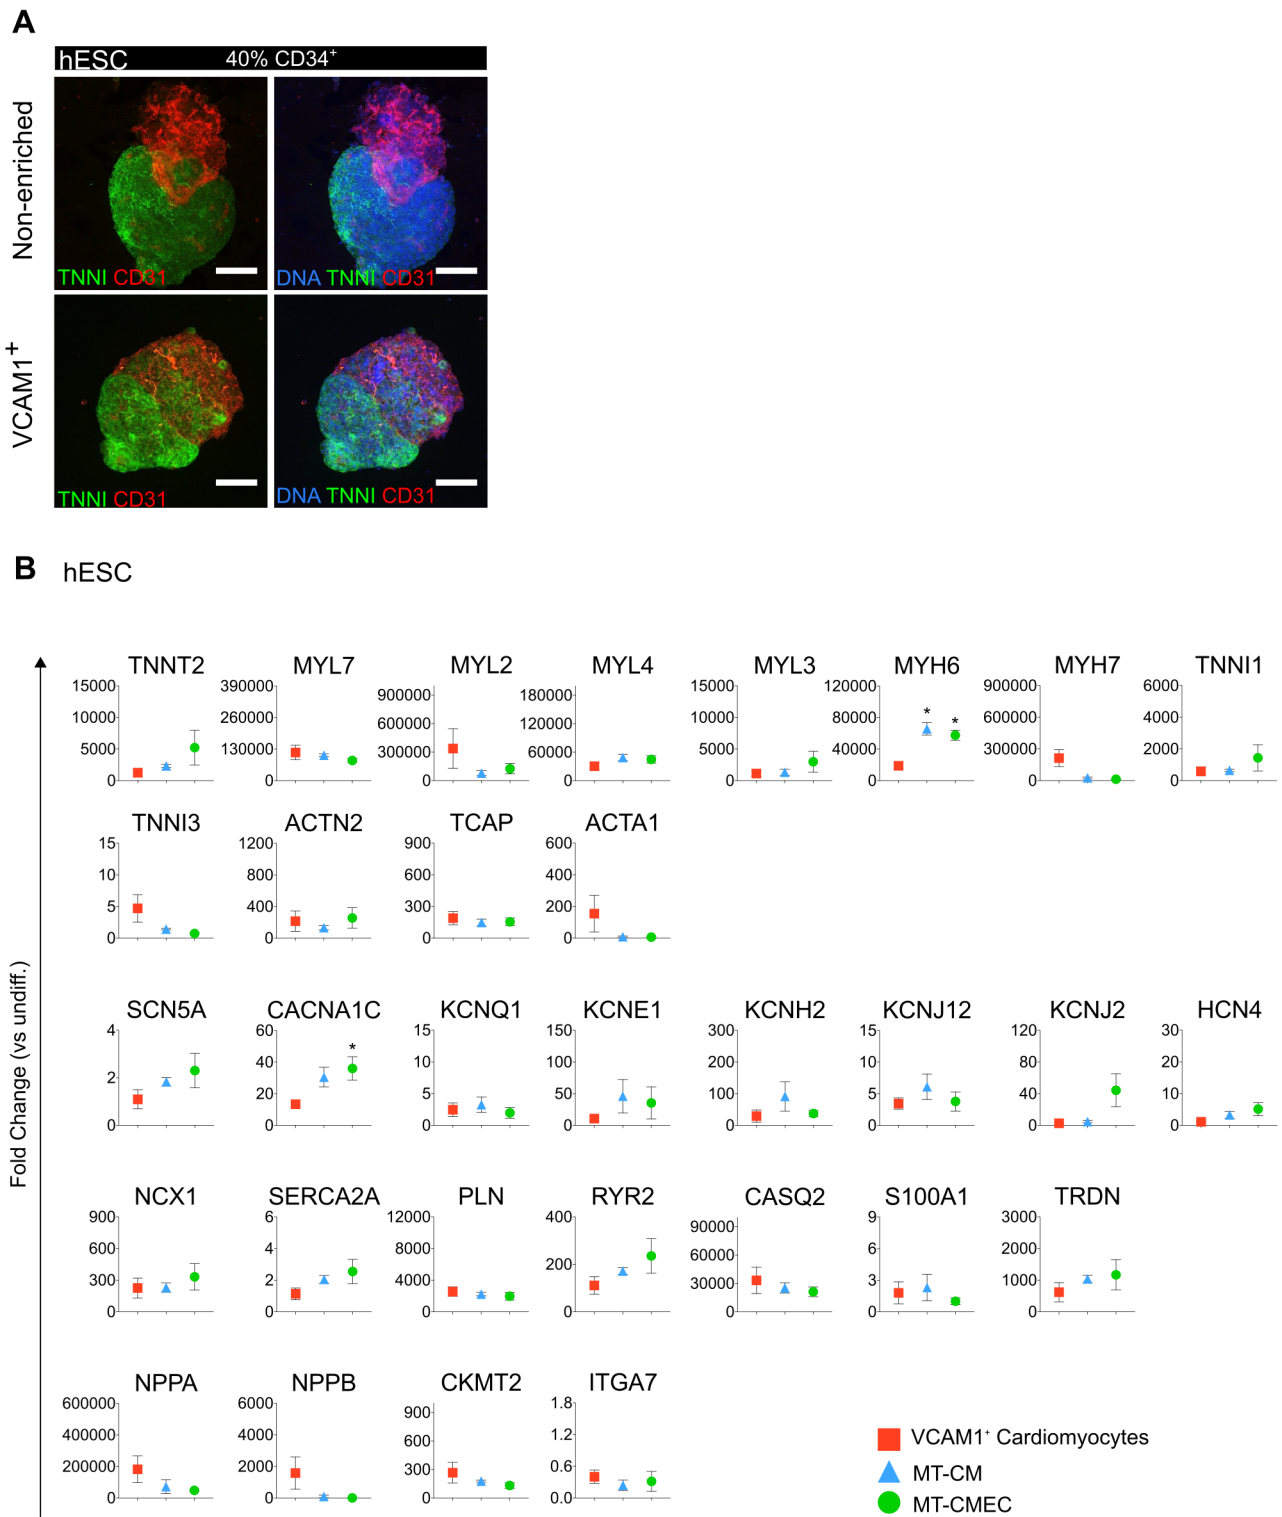

FIGURE S4

**Figure S4. Characterization of day 7-MTs from hESCs.** (A) Immunofluorescence analysis of sarcomeric cardiomyocyte TNNI (green) and endothelial cell surface marker CD31 (red) of cardiac MTs from non-enriched (upper panel) and enriched VCAM1<sup>+</sup> (lower panel) cardiomyocytes. Immunofluorescence data refer to day 7-MTs generated from *NKX2-5<sup>eGFP/w</sup>* hESCs. Percentages of CD34<sup>+</sup> cells are shown at the top. Nuclei are stained in blue with DAPI. Scale bar: 100  $\mu$ m. (B) qRT-PCR analysis for key sarcomeric genes, ion channels and calcium-handling genes, as well as other cardiac genes of interest on day 7 MT-CM, MT-CMEC and on day 21-age-matched VCAM1<sup>+</sup> cardiomyocytes from hESCs. All values are normalized to *RPL37A* and are relative to undifferentiated hESCs. Ordinary one-way ANOVA with Tukey's multiple comparisons test. \* =  $P < 0.05$  vs. VCAM1<sup>+</sup> cardiomyocytes.  $N \geq 3$ . Data are shown as mean  $\pm$  SEM.



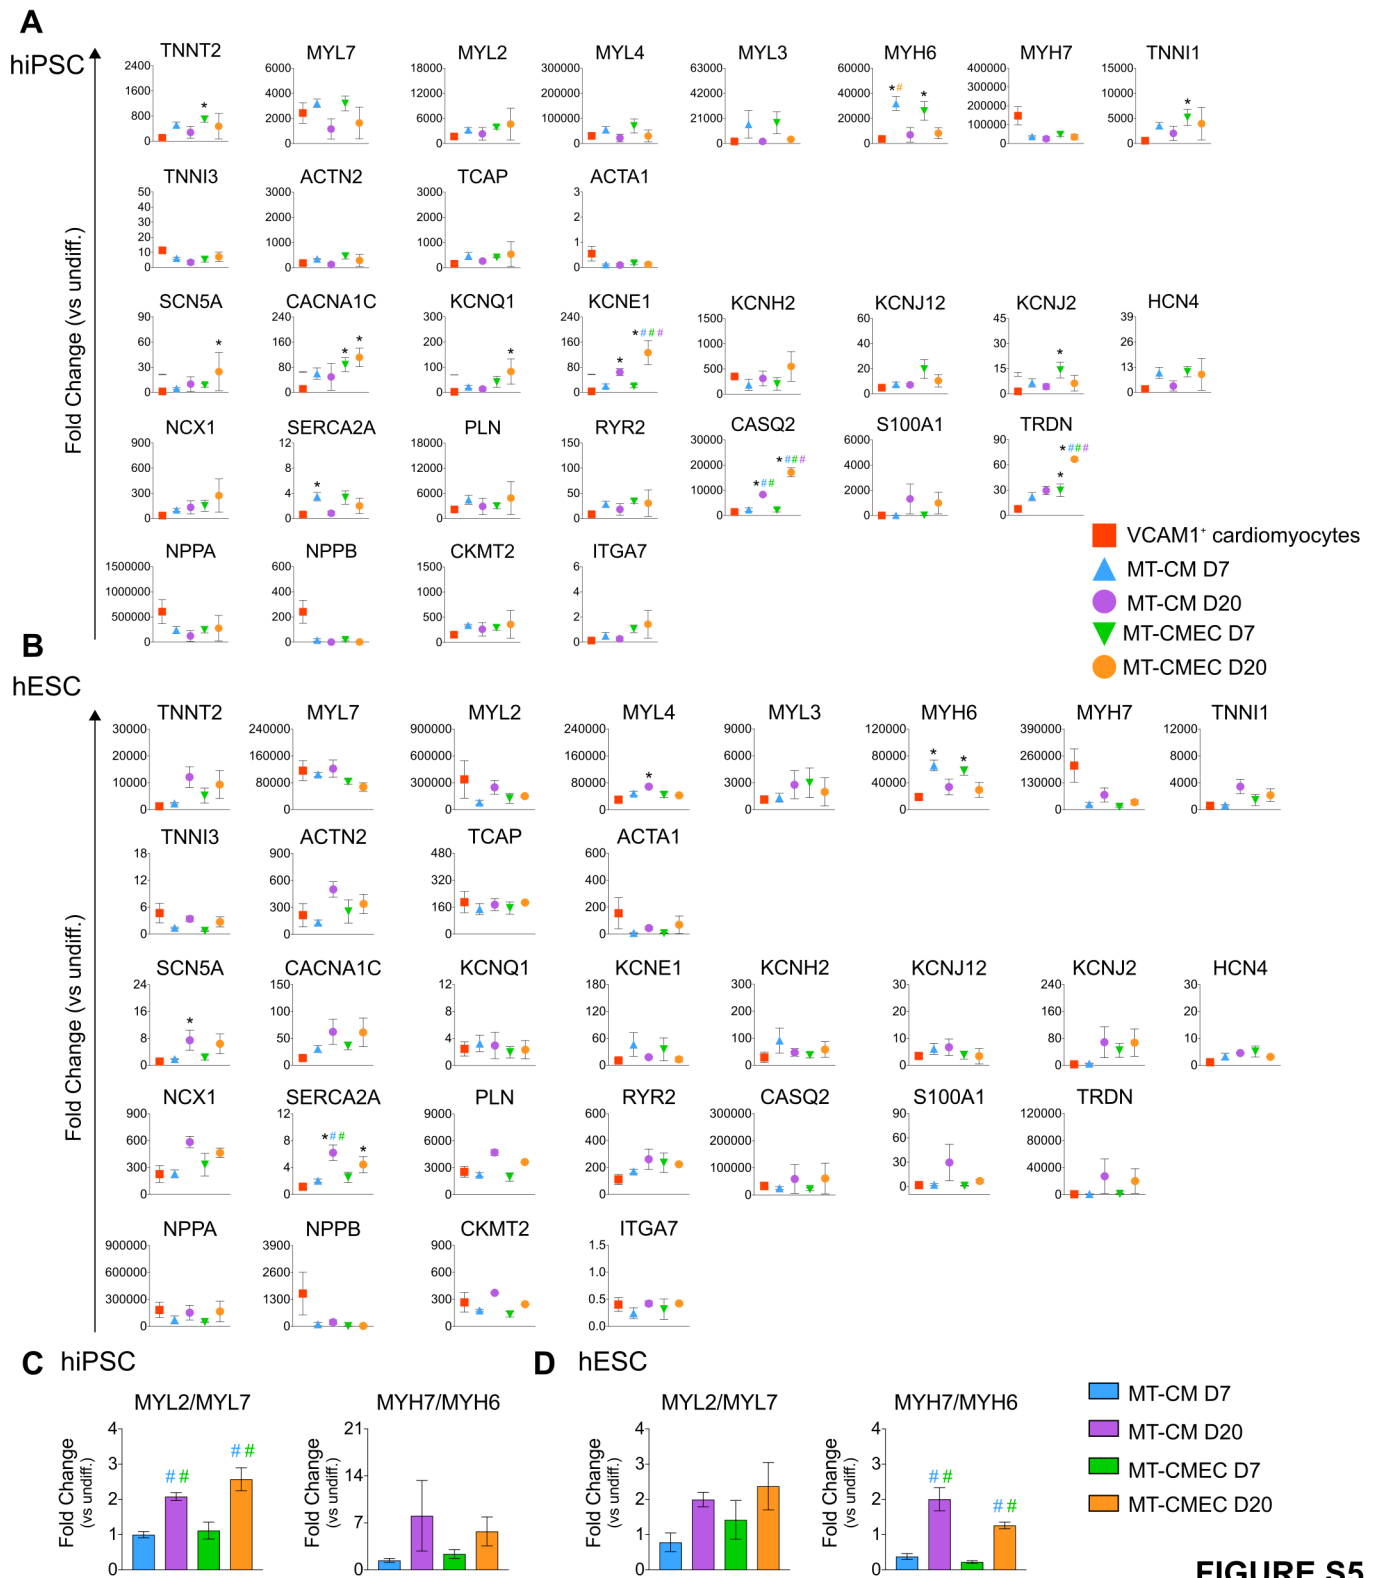

FIGURE S5

**Figure S5. Gene expression profile of day 20-MTs.** (A) qRT-PCR analysis for key sarcomeric genes, ion channels involved in AP shaping and calcium regulatory genes, as well as other cardiac genes of interest on day 7 and day 20 MT-CM and MT-CMEC together with VCAM1<sup>+</sup> cardiomyocytes generated from hiPSCs and (B) hESCs. All values are normalized to *RPL37A* and are relative to undifferentiated hiPSCs or hESCs. Ordinary one-way ANOVA with Tukey's multiple comparisons test. \* =  $P < 0.05$  vs. VCAM1<sup>+</sup> cardiomyocytes. # =  $P < 0.05$  vs. corresponding colour coding group.  $N \geq 2$ . Data are shown as mean  $\pm$  SEM. (C) qRT-PCR analysis for *MYL2/MYL7* ratio (left panel) and *MYH7/MYH6* ratio (right panel) on day 7 and day 20 MT-CM from hiPSCs and (D) hESCs. Values are normalized to *RPL37A* and relative to undifferentiated hiPSCs or hESCs. Ordinary one-way ANOVA with Tukey's multiple comparisons test. # =  $P < 0.05$  vs. corresponding colour coding group.  $N \geq 2$ . Data are shown as mean  $\pm$  SEM.

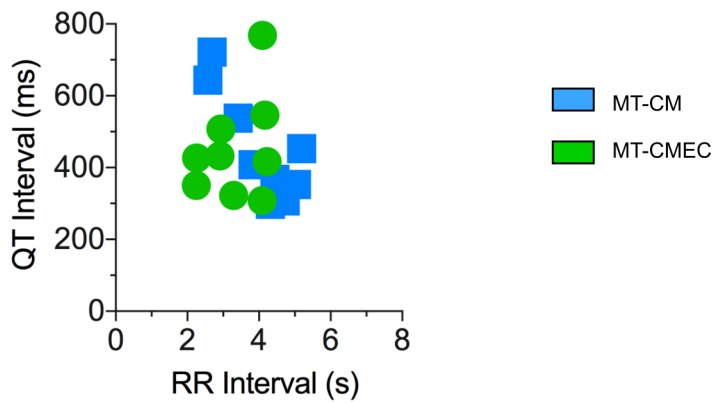

**FIGURE S6**

**Figure S6. Rate-dependency of MTs by MEA.** Correlation between QT-interval and RR-interval from MT-CM (blue) and MT-CMEC (green) from hiPSCs. A comparable electrical phenotype was exhibited by both MT-CM and MT-CMEC, indicating that the presence of endothelial cells did not affect the QT-RR relationship.

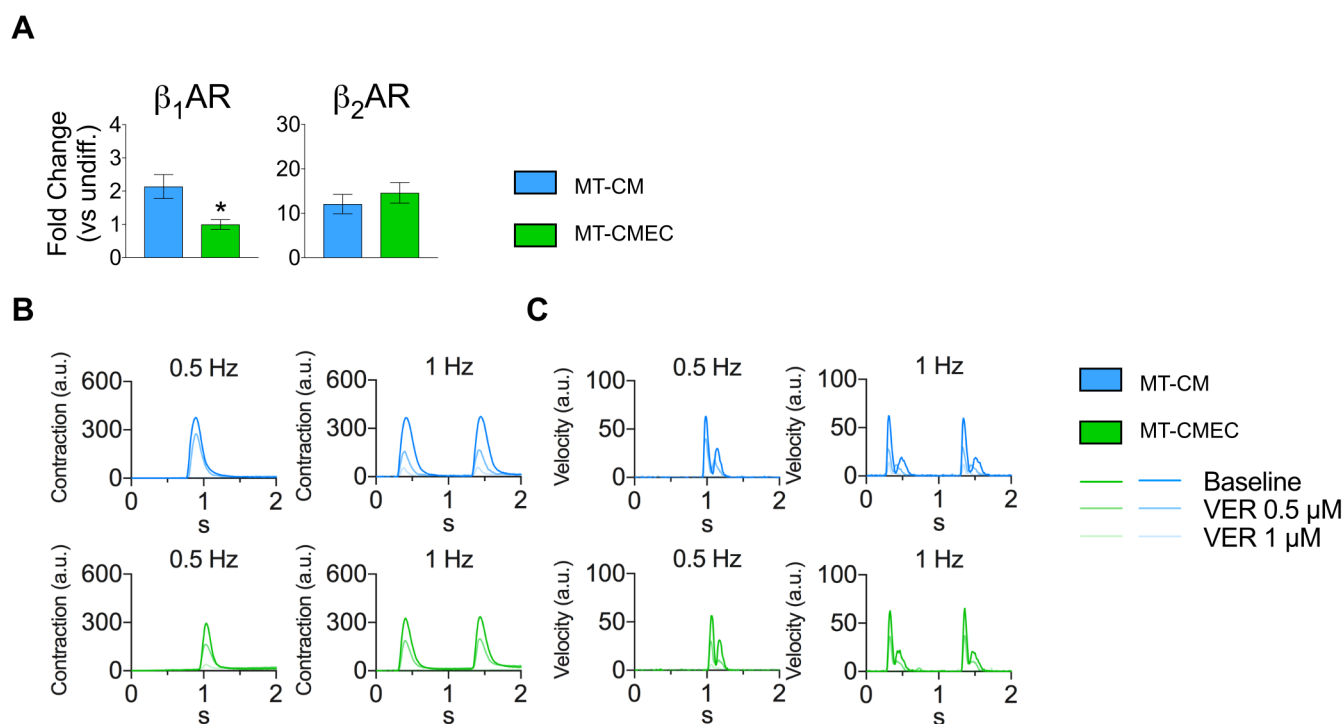

FIGURE S7

**Figure S7.  $\beta$ -adrenoreceptors and contraction profile of MTs from hESCs.** (A) qRT-PCR analysis of  $\beta$ -adrenoreceptors ( $\beta_1$  AR, left panel;  $\beta_2$  AR, right panel) in day-7 MT-CM and MT-CMEC from hESCs. Values are normalized to *RPL37A* and relative to undifferentiated hESCs. Mann-Whitney test. \* =  $P < 0.05$  vs. MT-CM.  $N = 3$ . Data are shown as mean  $\pm$  SEM (B) Representative traces of contraction and contraction velocity (C) profiles of MT-CM (blue) and MT-CMEC (green) generated from hESCs and paced at 0.5 and 1 Hz, in baseline and after superfusion of 500 nM and 1  $\mu$ M VER.

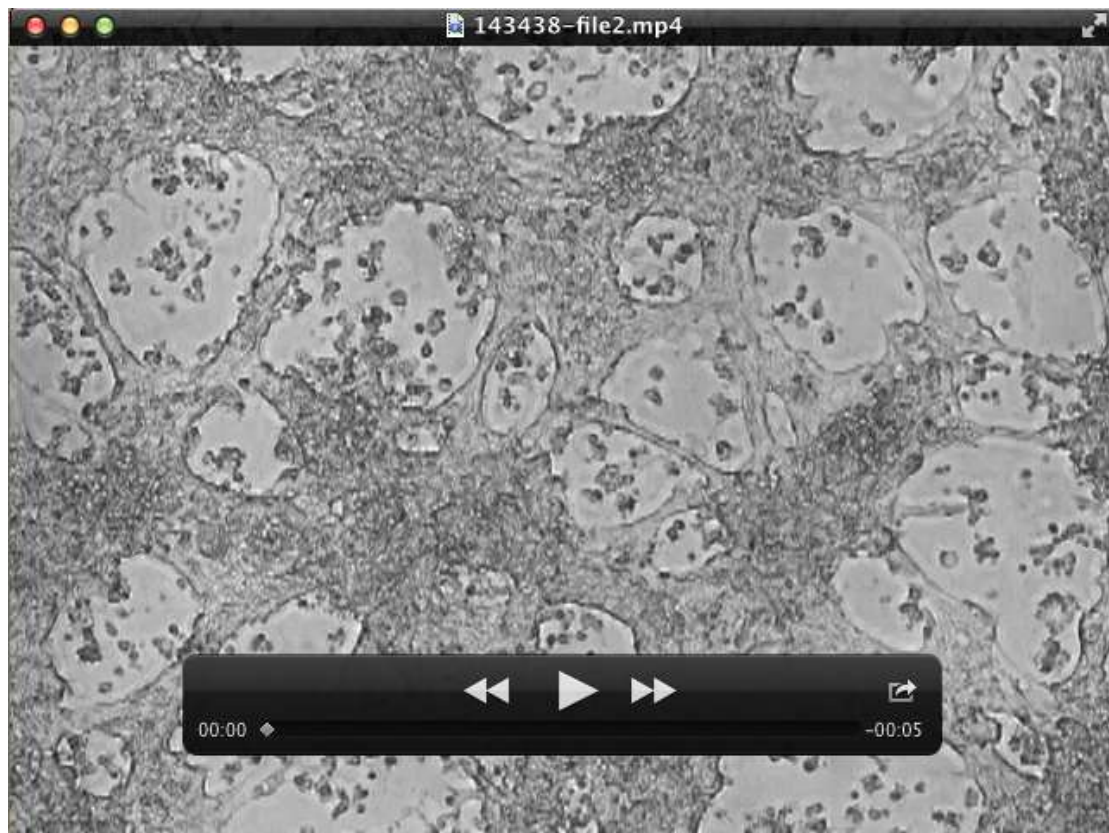

**Movie 1**

Beating monolayers of day 10-differentiated NKX2.5<sup>eGFP/w</sup> hESCs upon CM condition.

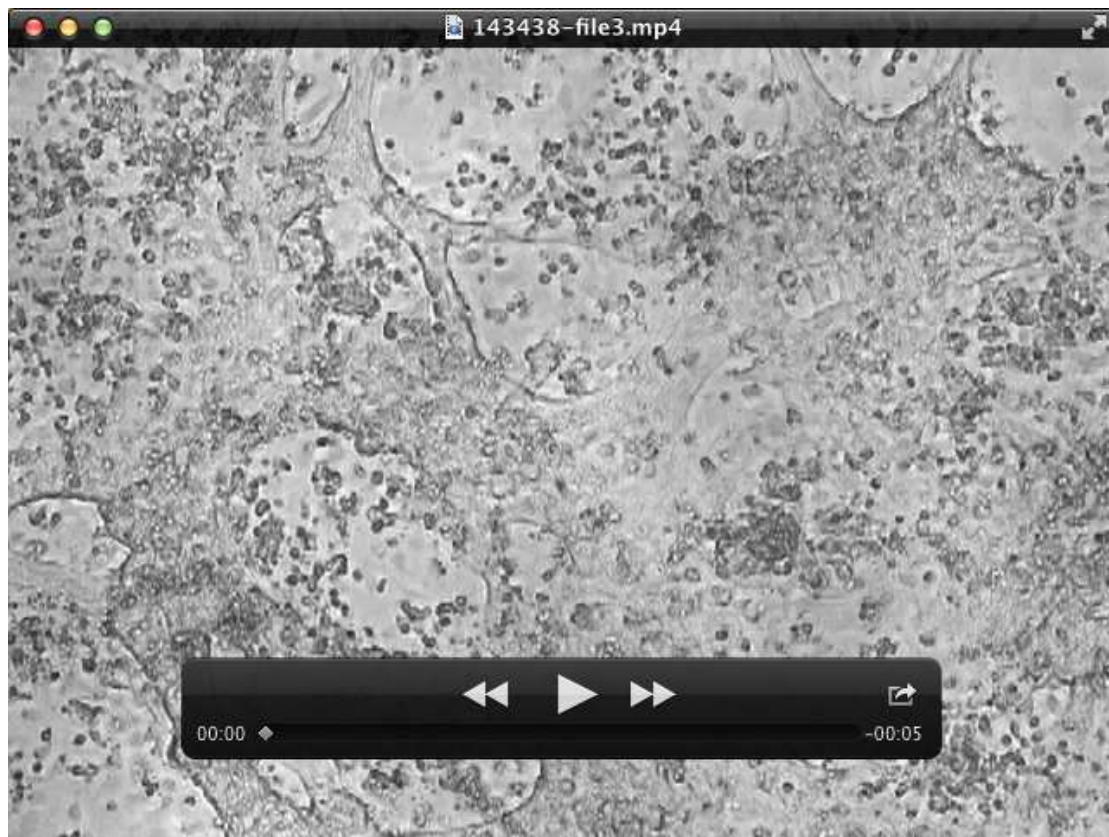

**Movie 2**

Beating monolayers of day 10-differentiated NKX2.5<sup>eGFP/w</sup> hESCs upon CMEC condition.

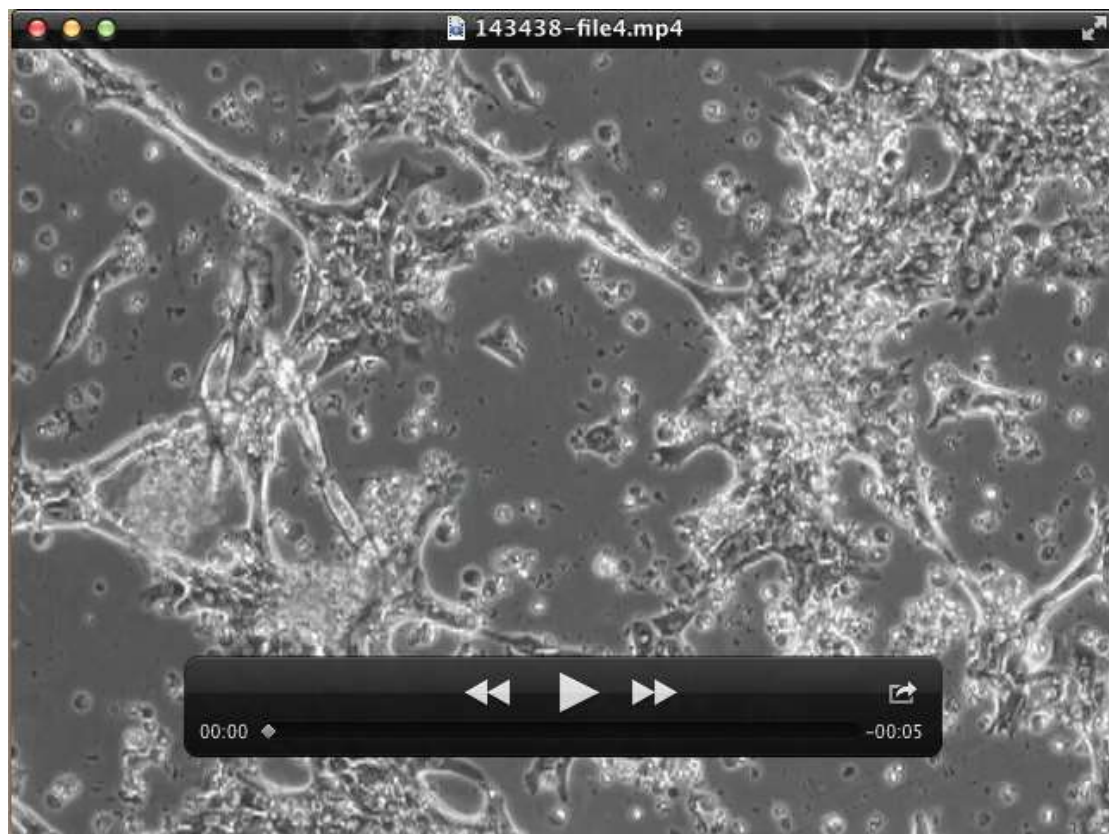

**Movie 3**

Beating monolayers of hiPSC-VCAM1<sup>+</sup> cardiomyocytes after isolation and re-plating.
